# Supplementary material for: The role of surface functionalization in quantum dot-based photocatalytic CO2 reduction: balancing efficiency and stability
Source: Royal Society of Chemistry journal article supplement (doi:10.1039/d3nr06177a), 2024-01-01
Supplement: d3nr06177a1.pdf [file d3nr06177a1.pdf]

Electronic Supplementary Information for:

**The role of surface functionalization in quantum dot-based  
photocatalytic CO<sub>2</sub> reduction: balancing efficiency and stability**

Frida Hernandez,<sup>1</sup> Maggie Yang,<sup>1</sup> Nejc Nagelj,<sup>1</sup> Autumn Y. Lee,<sup>1</sup> Hasun Noh,<sup>1</sup> Kyle P. Hur,<sup>1</sup>

Xinyu Fu,<sup>1</sup> Caleb J. Savoie,<sup>1</sup> Adam M. Schwartzberg,<sup>2</sup> Jacob H. Olshansky<sup>1\*</sup>

<sup>1</sup>Department of Chemistry, Amherst College, Amherst, MA 01002, USA

<sup>2</sup>The Molecular Foundry, Lawrence Berkeley National Laboratory, Berkeley, CA 94720, USA

Email: \*jolshansky@amherst.edu

## Contents

|                                                                   |    |
|-------------------------------------------------------------------|----|
| Photocatalysis experiments.....                                   | 3  |
| Varying NaAsc concentration with AET and MPA QDs .....            | 3  |
| Varying NaAsc and TEOA concentrations with AET QDs.....           | 4  |
| Experiments with a mixture of hole scavengers and AET QDs.....    | 5  |
| Long duration experiments comparing AET and MPA .....             | 6  |
| Varying catalyst concentration with AET QDs.....                  | 7  |
| Calculations of TON, selectivity, and mmol CO per gram ZnSe ..... | 8  |
| Table of results .....                                            | 9  |
| Table of control experiments.....                                 | 11 |
| Transient absorption data and fits .....                          | 12 |
| Transient spectra for AET QDs.....                                | 12 |
| Transient spectra for MPA QDs.....                                | 13 |
| Trapped carrier dynamics.....                                     | 14 |

## Photocatalysis experiments

### Varying NaAsc concentration with AET and MPA QDs

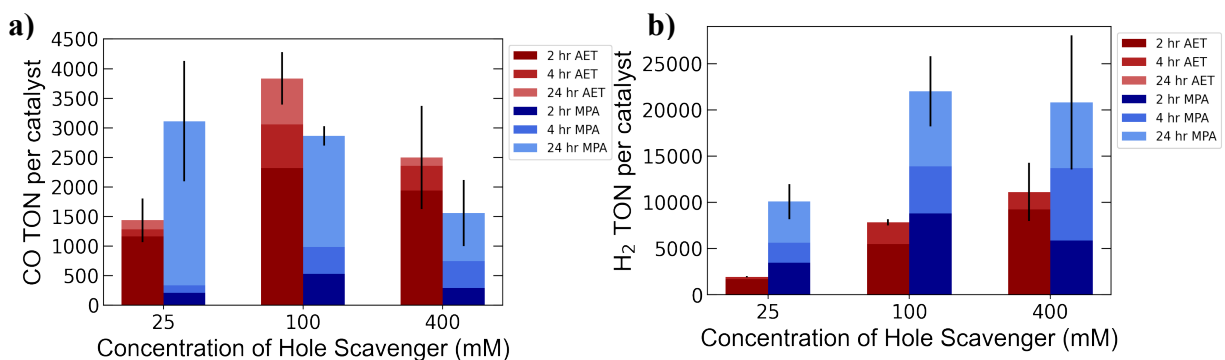

**Figure S1.** Comparing (a) CO TON and (b) H<sub>2</sub> TON for both AET and MPA QDs. Note that (a) is the same as main text Figure 1b. Photocatalysis experiments were performed in triplicate on 2.0 mL aqueous solutions of 0.4  $\mu$ M ZnSe QDs and 0.4  $\mu$ M Co-TPP, irradiated with 400 nm LEDs.

## Varying NaAsc and TEOA concentrations with AET QDs

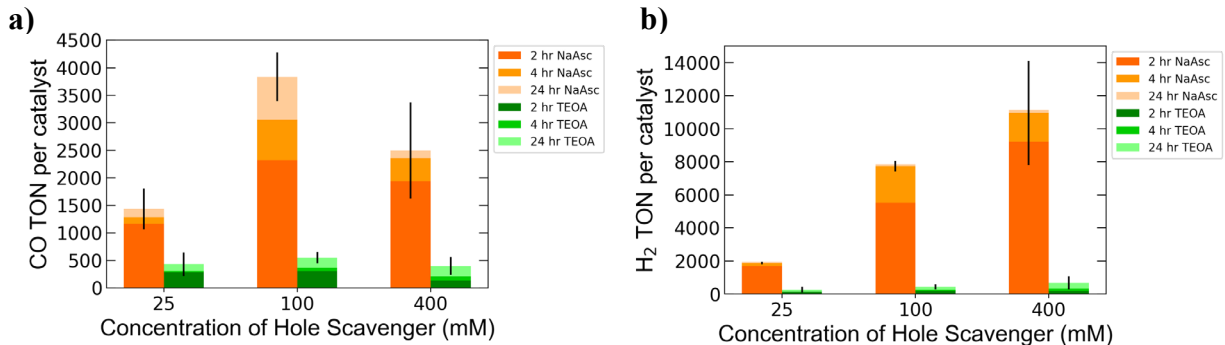

**Figure S2.** (a) CO TON and (b) H<sub>2</sub> TON for AET QDs with NaAsc and TEOA at varying concentrations. Note that (a) is the same as main text Figure 1d. Photocatalysis experiments were performed in triplicate on 2.0 mL aqueous solutions of 0.4  $\mu\text{M}$  ZnSe QDs and 0.4  $\mu\text{M}$  Co-TPP, irradiated with 400 nm LEDs.

## Experiments with a mixture of hole scavengers and AET QDs

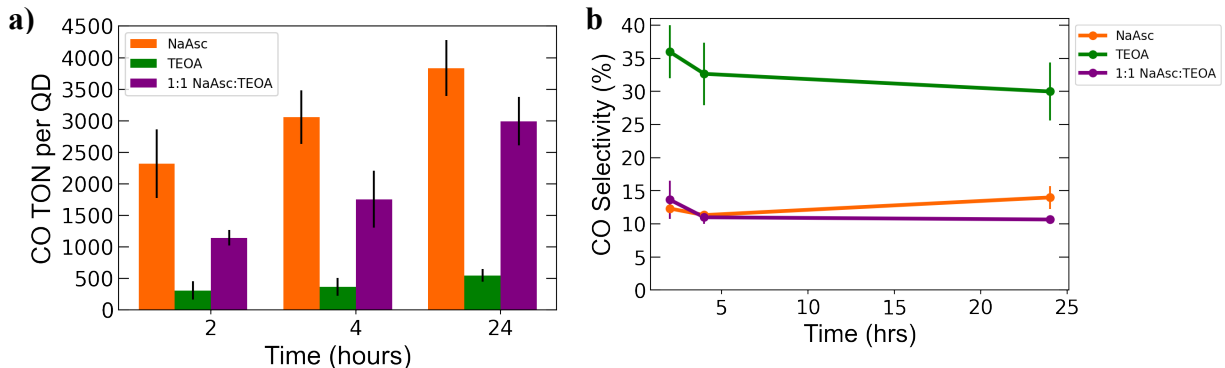

**Figure S3.** (a) CO TON and (c) selectivity for AET QDs with TEOA, NaAsc, or a mixture of both hole scavengers. The mixture produced both low selectivities and lower yields, and was therefore not pursued further. Photocatalysis experiments were performed in triplicate on 2.0 mL aqueous solutions of 0.4  $\mu\text{M}$  ZnSe QDs, 0.4  $\mu\text{M}$  Co-TPP, and 100 mM total hole scavenger and were irradiated with 400 nm LEDs.

## Long duration experiments comparing AET and MPA

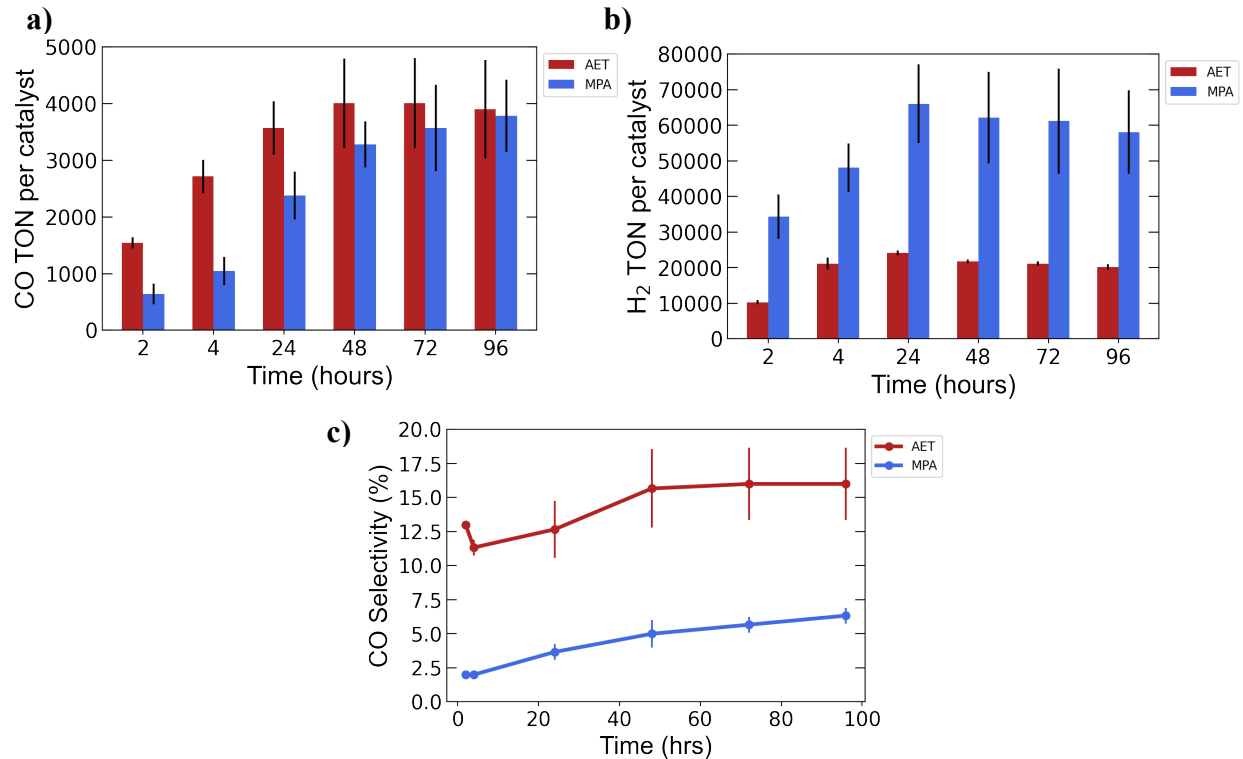

**Figure S4.** (a) CO TON, (b) H<sub>2</sub> TON, and (c) selectivity for AET and MPA QDs in four-day photocatalysis experiments. Note that (a) is the same as main text Figure 2a. Photocatalysis experiments were performed in triplicate on 2.0 mL aqueous solutions of 0.4  $\mu\text{M}$  ZnSe QDs and 0.4  $\mu\text{M}$  Co-TPP, irradiated with 400 nm LEDs.

## Varying catalyst concentration with AET QDs

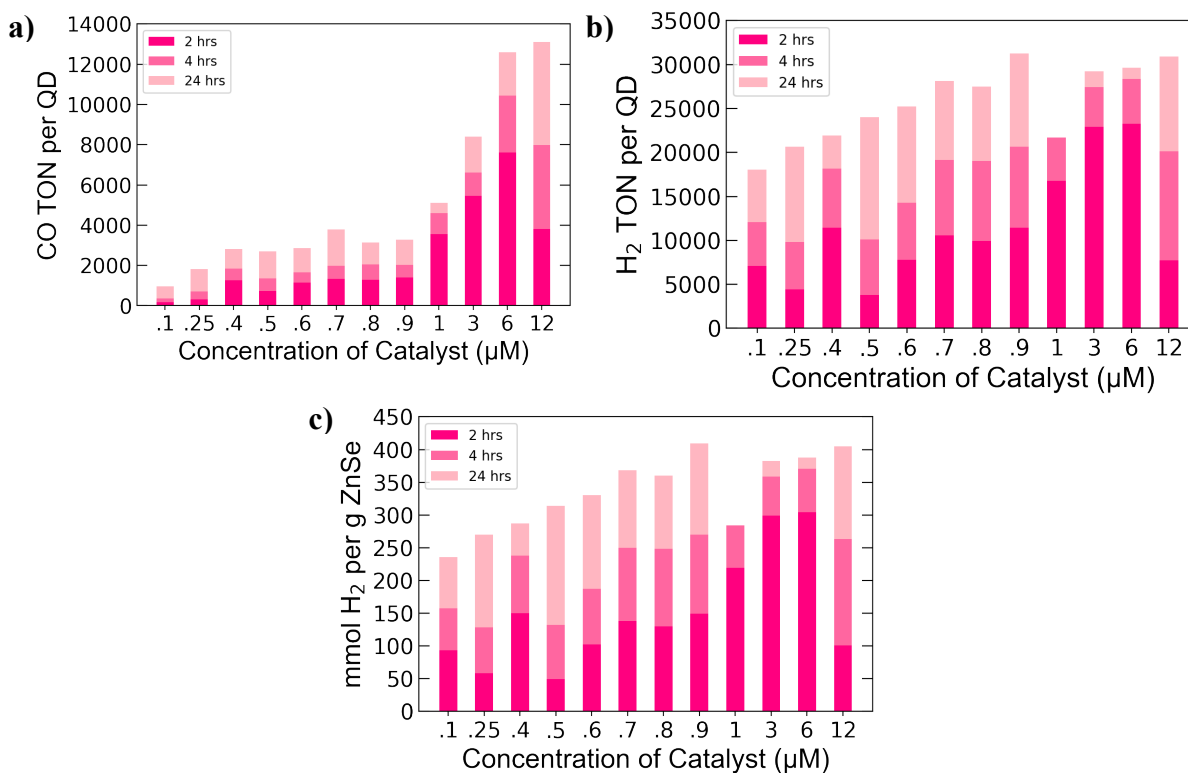

**Figure S5.** (a) CO TON per QD, (b) H<sub>2</sub> TON per QD, and (c) mmol H<sub>2</sub> produced per gram of ZnSe. These data are complimentary to those presented in Figure 4. Photocatalysis experiments were performed on 2.0 mL aqueous solutions of 0.4 μM ZnSe QDs and 50 mM NaAsc, irradiated with 400 nm LEDs.

## Calculations of TON, selectivity, and mmol CO per gram ZnSe

Peak integrations on GC chromatograms were calculated using the PeakSimple program and compared to calibration values to determine mole percent of H<sub>2</sub> and CO in reaction vials. Measured percentages were typically in the 0 – 3 % range. Assuming a 22 mL volume and ideal gas behavior, percentages could be converted to molar quantities. In the best performing samples ~10 μmol of CO were produced and up to 60 μmol of H<sub>2</sub> were produced. Turnover numbers were computed using the following equations:  $CO\ TON = \frac{mol\ CO\ produced}{mol\ Co-TPP\ catalyst}$  and  $H_2\ TON = \frac{mol\ H_2\ produced}{mol\ Co-TPP\ catalyst}$ . In certain instances, we have also reported TON per QD. Selectivity was calculated using the following equation:  $CO\ selectivity = \frac{mol\ CO}{mol\ H_2 + mol\ CO}$ .

To calculate the mmol CO produced per gram of ZnSe QDs, we had to calculate the total mass of QDs. The 3.6 nm diameter was used to calculate a volume (~2.4\*10<sup>-20</sup> cm<sup>3</sup>) per QD and then a mass (~1.3\*10<sup>-19</sup> g) per QD using the density of ZnSe (5.27 g cm<sup>-3</sup>). The number of QDs per reaction (0.8 nmol) was then used to determine the total mass per reaction (~61 μg ZnSe), which could be used with CO quantities to determine mmol CO per gram ZnSe.



## Table of results

**Table S1.** Summary of photocatalysis experimental results. ZnSe QDs were present at a concentration of 0.4  $\mu\text{M}$  for all samples. Errors are provided only for data collected in triplicate.

| Ligand | Hole Scavenger (mM) | Catalyst ( $\mu\text{M}$ ) | CO TON per catalyst        | H <sub>2</sub> TON per catalyst | CO Selectivity (%) | Time (h) |
|--------|---------------------|----------------------------|----------------------------|---------------------------------|--------------------|----------|
| AET    | NaAsc (25)          | 0.4                        | $(1.2 \pm 0.4) \cdot 10^3$ | $(1.7 \pm 0.5) \cdot 10^3$      | $18 \pm 3$         | 2        |
|        |                     |                            | $(1.3 \pm 0.4) \cdot 10^3$ | $(2.0 \pm 0.3) \cdot 10^3$      | $17 \pm 3$         | 4        |
|        |                     |                            | $(1.4 \pm 0.4) \cdot 10^3$ | $(1.88 \pm 0.08) \cdot 10^3$    | $20. \pm 4$        | 20       |
| AET    | NaAsc (50)          | 0.1                        | $0.72 \cdot 10^3$          | $2.84 \cdot 10^4$               | 2                  | 2        |
|        |                     |                            | $1.44 \cdot 10^3$          | $4.8 \cdot 10^4$                | 3                  | 4        |
|        |                     |                            | $3.84 \cdot 10^3$          | $7.2 \cdot 10^4$                | 5                  | 20       |
| AET    | NaAsc (50)          | 0.25                       | $0.48 \cdot 10^3$          | $7.04 \cdot 10^3$               | 6                  | 2        |
|        |                     |                            | $1.104 \cdot 10^3$         | $1.568 \cdot 10^4$              | 7                  | 4        |
|        |                     |                            | $2.88 \cdot 10^3$          | $3.36 \cdot 10^4$               | 8                  | 20       |
| AET    | NaAsc (50)          | 0.4                        | $1.3 \cdot 10^3$           | $1.1 \cdot 10^4$                | 10                 | 2        |
|        |                     |                            | $1.8 \cdot 10^3$           | $1.8 \cdot 10^4$                | 9                  | 4        |
|        |                     |                            | $2.8 \cdot 10^3$           | $2.2 \cdot 10^4$                | 11                 | 20       |
| AET    | NaAsc (50)          | 0.5                        | $0.592 \cdot 10^3$         | $3.04 \cdot 10^3$               | 16                 | 2        |
|        |                     |                            | $1.12 \cdot 10^3$          | $8. \cdot 10^3$                 | 12                 | 4        |
|        |                     |                            | $2.16 \cdot 10^3$          | $1.92 \cdot 10^4$               | 10                 | 20       |
| AET    | NaAsc (50)          | 0.6                        | $0.733 \cdot 10^3$         | $5.2 \cdot 10^3$                | 13                 | 2        |
|        |                     |                            | $1.133 \cdot 10^3$         | $9.333 \cdot 10^3$              | 10                 | 4        |
|        |                     |                            | $1.933 \cdot 10^3$         | $1.6667 \cdot 10^4$             | 10                 | 20       |
| AET    | NaAsc (50)          | 0.7                        | $0.743 \cdot 10^3$         | $6.286 \cdot 10^3$              | 11                 | 2        |
|        |                     |                            | $1.143 \cdot 10^3$         | $1.0857 \cdot 10^4$             | 9                  | 4        |
|        |                     |                            | $2.171 \cdot 10^3$         | $1.6000 \cdot 10^4$             | 12                 | 20       |
| AET    | NaAsc (50)          | 0.8                        | $0.65 \cdot 10^3$          | $4.950 \cdot 10^3$              | 11                 | 2        |
|        |                     |                            | $1. \cdot 10^3$            | $9.5 \cdot 10^3$                | 10                 | 4        |
|        |                     |                            | $1.550 \cdot 10^3$         | $1.4 \cdot 10^4$                | 10                 | 20       |
| AET    | NaAsc (50)          | 0.9                        | $0.622 \cdot 10^3$         | $4.889 \cdot 10^3$              | 11                 | 2        |
|        |                     |                            | $0.889 \cdot 10^3$         | $9.333 \cdot 10^3$              | 9                  | 4        |
|        |                     |                            | $1.467 \cdot 10^3$         | $1.3778 \cdot 10^4$             | 9                  | 20       |
| AET    | NaAsc (50)          | 1                          | $1.44 \cdot 10^3$          | $6.8 \cdot 10^3$                | 18                 | 2        |
|        |                     |                            | $1.84 \cdot 10^3$          | $8.8 \cdot 10^3$                | 18                 | 4        |
|        |                     |                            | $2.04 \cdot 10^3$          | $8.4 \cdot 10^3$                | 20                 | 20       |
| AET    | NaAsc (50)          | 3                          | $0.733 \cdot 10^3$         | $3.067 \cdot 10^3$              | 19                 | 2        |
|        |                     |                            | $0.880 \cdot 10^3$         | $3.6 \cdot 10^3$                | 19                 | 4        |
|        |                     |                            | $1.12 \cdot 10^3$          | $3.867 \cdot 10^3$              | 22                 | 20       |
| AET    | NaAsc (50)          | 6                          | $0.507 \cdot 10^3$         | $1.533 \cdot 10^3$              | 25                 | 2        |
|        |                     |                            | $0.667 \cdot 10^3$         | $1.867 \cdot 10^3$              | 27                 | 4        |
|        |                     |                            | $0.867 \cdot 10^3$         | $2. \cdot 10^3$                 | 30                 | 20       |
| AET    | NaAsc (50)          | 12                         | $0.127 \cdot 10^3$         | $0.257 \cdot 10^3$              | 33                 | 2        |
|        |                     |                            | $0.267 \cdot 10^3$         | $0.667 \cdot 10^3$              | 28                 | 4        |
|        |                     |                            | $0.433 \cdot 10^3$         | $1.033 \cdot 10^3$              | 30                 | 20       |

|     |                                 |     |                              |                              |                |    |
|-----|---------------------------------|-----|------------------------------|------------------------------|----------------|----|
| AET | NaAsc<br>(100)                  | 0.4 | $(2.3 \pm 0.5) \cdot 10^3$   | $(5.5 \pm 1.8) \cdot 10^3$   | $12.3 \pm 1.5$ | 2  |
|     |                                 |     | $(3.1 \pm 0.4) \cdot 10^3$   | $(7.9 \pm 1.4) \cdot 10^3$   | $11.3 \pm 1.3$ | 4  |
|     |                                 |     | $(3.8 \pm 0.5) \cdot 10^3$   | $(7.7 \pm 0.3) \cdot 10^3$   | $14.0 \pm 1.7$ | 20 |
|     |                                 |     | $(4.0 \pm 0.8) \cdot 10^3$   | $(21.7 \pm 0.6) \cdot 10^3$  | $15.7 \pm 2.7$ | 48 |
|     |                                 |     | $(4.0 \pm 0.8) \cdot 10^3$   | $(21.1 \pm 0.6) \cdot 10^3$  | $16.0 \pm 2.6$ | 72 |
|     |                                 |     | $3.9 \pm 0.9) \cdot 10^3$    | $(20.2 \pm 0.8) \cdot 10^3$  | $16.0 \pm 1.6$ | 96 |
| AET | NaAsc<br>(400)                  | 0.4 | $(1.9 \pm 0.8) \cdot 10^3$   | $(9 \pm 3) \cdot 10^3$       | $6.3 \pm 1.1$  | 2  |
|     |                                 |     | $(2.4 \pm 0.7) \cdot 10^3$   | $(11.1 \pm 2.2) \cdot 10^3$  | $6.7 \pm 0.6$  | 4  |
|     |                                 |     | $(2.5 \pm 0.9) \cdot 10^3$   | $(11 \pm 3) \cdot 10^3$      | $6.7 \pm 0.6$  | 20 |
| AET | TEOA<br>(25)                    | 0.4 | $(2.8 \pm 1.1) \cdot 10^2$   | $(1.6 \pm 0.7) \cdot 10^2$   | $39. \pm 16$   | 2  |
|     |                                 |     | $(3.1 \pm 1.2) \cdot 10^2$   | $(1.35 \pm 0.27) \cdot 10^2$ | $42. \pm 5$    | 4  |
|     |                                 |     | $(5.1 \pm 2.1) \cdot 10^2$   | $(2.6 \pm 1.7) \cdot 10^2$   | $37. \pm 7$    | 20 |
| AET | TEOA<br>(100)                   | 0.4 | $(3.1 \pm 1.5) \cdot 10^2$   | $(1.9 \pm 1.2) \cdot 10^2$   | $36. \pm 4$    | 2  |
|     |                                 |     | $(3.7 \pm 1.4) \cdot 10^2$   | $(2.7 \pm 1.5) \cdot 10^2$   | $33 \pm 5$     | 4  |
|     |                                 |     | $(5.5 \pm 1.0) \cdot 10^2$   | $(4.4 \pm 1.5) \cdot 10^2$   | $30. \pm 4$    | 20 |
| AET | TEOA<br>(400)                   | 0.4 | $(1.3 \pm 0.5) \cdot 10^2$   | $(2.0 \pm 0.5) \cdot 10^2$   | $17.7 \pm 2.1$ | 2  |
|     |                                 |     | $(2.1 \pm 0.9) \cdot 10^2$   | $(3.3 \pm 1.4) \cdot 10^2$   | $17.3 \pm 1.6$ | 4  |
|     |                                 |     | $(4.0 \pm 1.6) \cdot 10^2$   | $(7 \pm 4) \cdot 10^2$       | $17.0 \pm 2.6$ | 20 |
| AET | NaAsc<br>(50) +<br>TEOA<br>(50) | 0.4 | $(1.15 \pm 0.13) \cdot 10^3$ | $(7.4 \pm 1.7) \cdot 10^3$   | $13.7 \pm 2.9$ | 2  |
|     |                                 |     | $(1.8 \pm 0.5) \cdot 10^3$   | $(14 \pm 3) \cdot 10^3$      | $11.0 \pm 1.0$ | 4  |
|     |                                 |     | $(3.0 \pm 0.4) \cdot 10^3$   | $(25.5 \pm 1.5) \cdot 10^3$  | $10.7 \pm 0.6$ | 20 |
| MPA | NaAsc<br>(25)                   | 0.4 | $(2.1 \pm 0.5) \cdot 10^2$   | $(3.5 \pm 0.6) \cdot 10^3$   | $2. \pm 0$     | 2  |
|     |                                 |     | $(3.4 \pm 1.3) \cdot 10^2$   | $(5.6 \pm 2.3) \cdot 10^3$   | $2. \pm 0$     | 4  |
|     |                                 |     | $(3.1 \pm 1.0) \cdot 10^3$   | $(10.1 \pm 1.9) \cdot 10^3$  | $10. \pm 4$    | 20 |
| MPA | NaAsc<br>(100)                  | 0.4 | $(5.4 \pm 2.3) \cdot 10^2$   | $(9 \pm 3) \cdot 10^3$       | $2. \pm 0$     | 2  |
|     |                                 |     | $(10 \pm 3) \cdot 10^2$      | $(14 \pm 4) \cdot 10^3$      | $2. \pm 0$     | 4  |
|     |                                 |     | $(2.86 \pm 0.17) \cdot 10^3$ | $(22 \pm 4) \cdot 10^3$      | $4.3 \pm 0.6$  | 20 |
|     |                                 |     | $(3.3 \pm 0.4) \cdot 10^3$   | $(6.2 \pm 1.3) \cdot 10^4$   | $5.0 \pm 1.0$  | 48 |
|     |                                 |     | $(3.6 \pm 0.8) \cdot 10^3$   | $(6.1 \pm 1.5) \cdot 10^4$   | $5.7 \pm 0.6$  | 72 |
|     |                                 |     | $(3.8 \pm 0.6) \cdot 10^3$   | $(5.8 \pm 1.2) \cdot 10^4$   | $6.3 \pm 0.6$  | 96 |
| MPA | NaAsc<br>(400)                  | 0.4 | $(3 \pm 3) \cdot 10^2$       | $(6 \pm 6) \cdot 10^3$       | $6 \pm 8$      | 2  |
|     |                                 |     | $(7 \pm 4) \cdot 10^2$       | $(14 \pm 6) \cdot 10^3$      | $1.3 \pm 0.6$  | 4  |
|     |                                 |     | $(1.6 \pm 0.6) \cdot 10^3$   | $(21 \pm 7) \cdot 10^3$      | $2.3 \pm 0.6$  | 20 |

## Table of control experiments

**Table S2.** Summary of control experiments demonstrating that all components were required to produce significant CO. It is worth highlighting that the QDs by themselves do produce significant H<sub>2</sub>. We believe that in this case, the ligand or surface Se atoms may be acting as the sacrificial reductants.

| Control            | NaAsc (mM) | Co-TPP (μM) | AET QD (μM) | CO TON per QD | CO TON per cat. | H <sub>2</sub> TON per QD | H <sub>2</sub> TON per cat. | CO Selectivity (%) | Time (h) |
|--------------------|------------|-------------|-------------|---------------|-----------------|---------------------------|-----------------------------|--------------------|----------|
| No light           | 100        | 0.4         | 0.4         | 0             | 0               | 220                       | 220                         | 0                  | 2        |
|                    |            |             |             | 0             | 0               | 250                       | 250                         | 0                  | 4        |
|                    |            |             |             | 0.38          | 0.38            | 200                       | 200                         | 0.002              | 20       |
| No CO <sub>2</sub> | 100        | 0.4         | 0.4         | 60.           | 60.             | 4.1*10 <sup>3</sup>       | 4.1*10 <sup>3</sup>         | 1                  | 2        |
|                    |            |             |             | 180           | 180             | 8.8*10 <sup>3</sup>       | 8.8*10 <sup>3</sup>         | 2                  | 4        |
|                    |            |             |             | 520           | 520             | 7.8*10 <sup>3</sup>       | 7.8*10 <sup>3</sup>         | 6                  | 20       |
| No QDs             | 100        | 1           | -           | -             | 23              | -                         | 0.69                        | 10                 | 2        |
|                    |            |             |             | -             | 48              | -                         | 1.7                         | 8                  | 4        |
|                    |            |             |             | -             | 120             | -                         | 4.9                         | 7                  | 20       |
| No catalyst        | 100        | -           | 0.4         | 110           | -               | 4.5*10 <sup>3</sup>       | -                           | 2                  | 2        |
|                    |            |             |             | 270           | -               | 6.8*10 <sup>3</sup>       | -                           | 4                  | 4        |
|                    |            |             |             | 880           | -               | 8.1*10 <sup>3</sup>       | -                           | 10                 | 20       |
| No hole scavenger  | -          | 1           | 1           | 31            | 31              | 1.5*10 <sup>3</sup>       | 1.5*10 <sup>3</sup>         | 2                  | 2        |
|                    |            |             |             | 58            | 58              | 1.8*10 <sup>3</sup>       | 1.8*10 <sup>3</sup>         | 3                  | 4        |

# Transient absorption data and fits

## Transient spectra for AET QDs

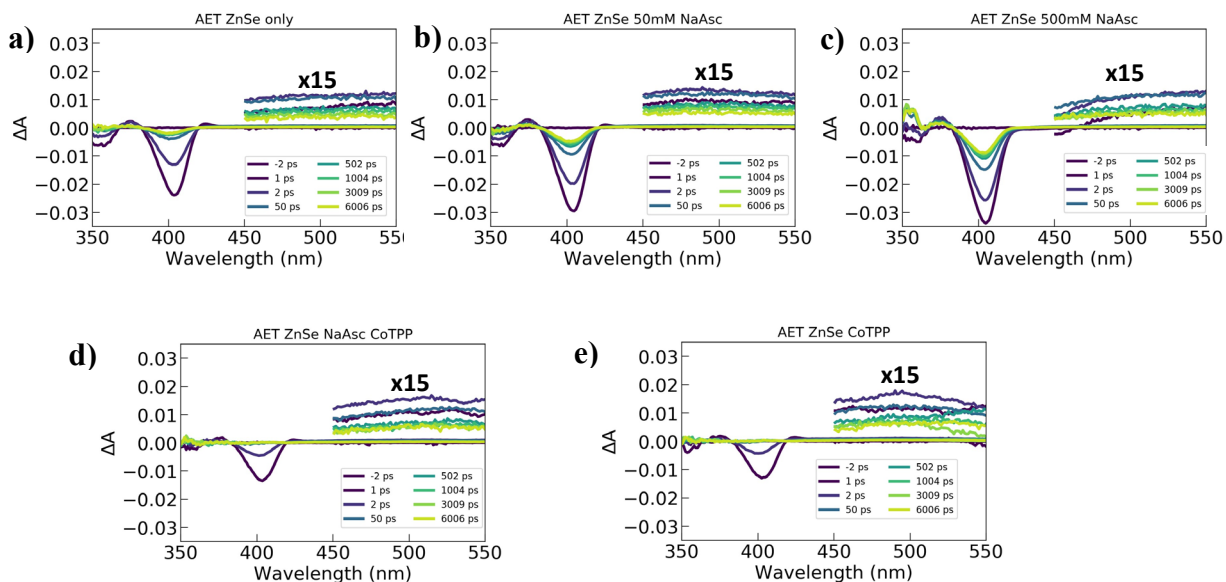

**Figure S6.** Transient spectra for AET QDs excited at 350 nm. (a) 6  $\mu$ M AET ZnSe QDs in water, (b) 6  $\mu$ M AET ZnSe QDs with 50 mM NaAsc in water, (c) 6  $\mu$ M AET ZnSe QDs with 500 mM NaAsc in water, (d) 5  $\mu$ M AET ZnSe QDs with 5  $\mu$ M Co-TPP in water, (e) 5  $\mu$ M AET ZnSe QDs with 5  $\mu$ M Co-TPP and 50 mM NaAsc in water.

## Transient spectra for MPA QDs

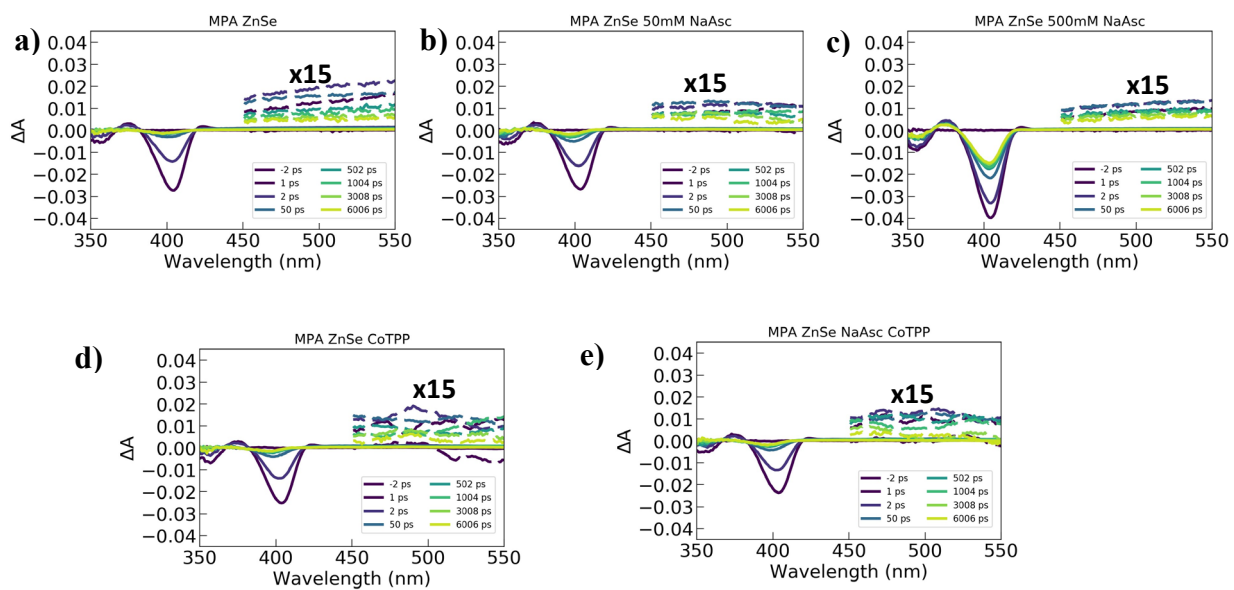

**Figure S7.** Transient spectra for MPA QDs excited at 350 nm. (a) 6  $\mu\text{M}$  MPA ZnSe QDs in water, (b) 6  $\mu\text{M}$  MPA ZnSe QDs with 50 mM NaAsc in water, (c) 6  $\mu\text{M}$  MPA ZnSe QDs with 500 mM NaAsc in water, (d) 5  $\mu\text{M}$  MPA ZnSe QDs with 5  $\mu\text{M}$  Co-TPP in water, (e) 5  $\mu\text{M}$  MPA ZnSe QDs with 5  $\mu\text{M}$  Co-TPP and 50 mM NaAsc in water.

## Trapped carrier dynamics

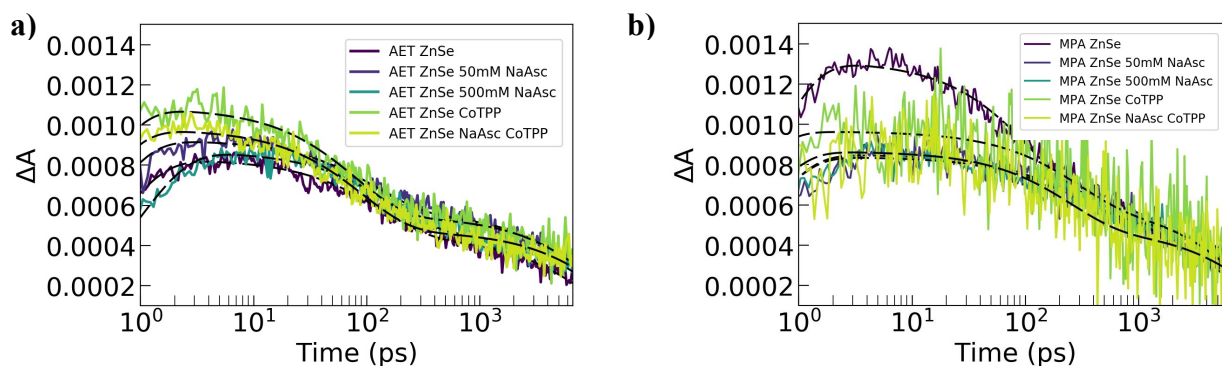

**Figure S8.** Kinetic traces for the broad photoinduced absorption feature (collected at 500 nm) for (a) AET QDs and (b) MPA QDs. Multi-exponential fits (dashed black lines) are overlaid.

**Table S3.** Fitting parameters for kinetic traces shown in Figure S8. Data were fit to multi-exponential functions that contain both an exponential rise and a bi-exponential decay. All times are in picoseconds.

| Sample               | $A_1$   | $\tau_1$ | $A_2$ | $\tau_2$ | $A_3$ | $\tau_3$ |
|----------------------|---------|----------|-------|----------|-------|----------|
| MPA ZnSe             | 0.00061 | 0.54     | 1.10  | 110      | 1.10  | 5800     |
| MPA ZnSe 50mM NaAsc  | 0.00074 | 0.50     | 0.43  | 290      | 0.72  | 12000    |
| MPA ZnSe 500mM NaAsc | 0.00095 | 0.47     | 0.31  | 260      | 0.58  | 15000    |
| MPA ZnSe CoTPP       | 0.00053 | 0.27     | 0.70  | 270      | 1.10  | 8800     |
| MPA ZnSe NaAsc CoTPP | 0.00083 | 0.41     | 0.47  | 250      | 0.57  | 11000    |
| AET ZnSe             | 0.00043 | 0.62     | 0.89  | 130      | 1.00  | 9100     |
| AET ZnSe 50mM NaAsc  | 0.00083 | 0.47     | 0.43  | 120      | 0.68  | 11000    |
| AET ZnSe 500mM NaAsc | 0.00072 | 1.00     | 0.54  | 160      | 0.67  | 12000    |
| AET ZnSe CoTPP       | 0.00025 | 0.39     | 2.10  | 79       | 2.10  | 12000    |
| AET ZnSe NaAsc CoTPP | 0.00049 | 0.38     | 1.00  | 91       | 0.97  | 14000    |

Data were fit to tri-exponential functions of the form  $\Delta A(t) = A_1 * \left(1 - e^{-\frac{t}{\tau_1}}\right) * \left(A_2 e^{-\frac{t}{\tau_2}} + A_3 e^{-\frac{t}{\tau_3}}\right)$
